# Supplementary material for: Carbon–carbon bond cleavage by cytochrome P450BioI(CYP107H1)
Source: Royal Society of Chemistry journal article supplement (doi:10.1039/b311652b), 2003-12-19
Supplement: b311652b.doc [file b311652b.doc]

**General Methods.** Diethyl ether and THF were distilled from sodium/benzophenone under nitrogen before use. CH2Cl2, DMSO and DMF were dried and distilled from CaH2 under nitrogen before use. Thin layer chromatography (TLC) was performed on Merck 60 F254 silica gel backed aluminium plates. Flash chromatography was performed using Merck Silica Gel 230-400 mesh (40-63m). Melting points were performed on a Büchi melting point apparatus and are uncorrected. NMR spectra were obtained using either a Bruker AC200F spectrometer or a Bruker DX400 spectrometer using CDCl3 as the solvent. Chemical shifts are given in ppm, referenced to the residual solvent peak ( = 7.24 for CDCl3). Coupling constants (*J*) are given in Hertz (Hz). The terms s, d, t, q, quint, m refer to singlet, doublet, triplet, quartet, quintet, multiplet; br implies the signal is broad. Elemental analyses were performed by the Microanalytical Service, Department of Chemistry, at the University of Queensland. High resolution mass spectra (HRMS) were measured by the Mass Spectroscopy Service, Department of Chemistry, at the University of Queensland. GC/MS analyses were performed on a Shimadzu GC-17A chromatograph fitted with a DB-5 column (J&W Scientific, 30 m, 0.25 mm internal diameter) connected to a Shimadzu QP-5000 mass spectrometer (70 eV). Chiral HPLC performed on a Shimadzu LC-10AT chromatograph fitted with a Chiracel OD column (Daicel Chemical Industries, 25 cm, 0.46 cm diameter) connected to a Shimadzu SPD-M10AVP PDA detector.

**Preparation of Enzymatic Substrates.** Prior to incubation with the active enzyme complex, all substrates were converted into their free acid salt via cleavage of the methyl ester using the following protocol: to a solution of fatty acid methyl ester (0.0155 mmol) stirring in 1:1 methanol/water (0.5 mL) was added lithium hydroxide (0.0310 mmol). The reaction was followed by TLC (1:1 ethyl acetate in hexanes) until total conversion to the acid was observed. The mixture was concentrated in vacuo to afford the substrate as its lithium salt.

**Enzymatic Turnover with P450BioI.** Turnovers with all probes were performed in duplicate using the following protocol with purified enzymes1: P450BioI (2000 L, 4.80 M, final concentration 2.40 M), fatty acid (1 mM final concentration), *E. coli* flavodoxin reductase (16 L, 120 M, final concentration 0.48 M), cindoxin (77 L, 250 M, final concentration 4.80 M) and catalase (1 M final concentration) were combined in a Wheaton reaction vial and diluted to the final volume (4000 L) with phosphate buffer (pH 7.4, 50 mM). NADPH (1.25 mM final concentration) was added to the solution and this was left to incubate for one hour. Phenylacetic acid (62.5 M final concentration) was then added as an internal standard. The reaction was acidified with HCl (1 M), extracted with ethyl acetate (3 x 3 mL) and the combined extracts treated with diazomethane. The turnover mixtures were concentrated before being analysed by GC/MS. Two blank turnovers were performed per substrate under identical conditions but with either NADPH or P450BioI omitted.

**GC Analysis of Turnovers.** GC Program for turnover analysis and standard identification: Splitless mode; Column Flow 1.0 mL/min; Split Ratio 100; Total Flow 102.2 mL/min; Injector 250C; Detector 250C; Oven 40C (1.0 min equilibration) hold for 4.0 min, ramp 10C/min to 250C and hold for 10.0 min (total program time 40.0 min). Retention times: heptanal 7.24 min, methyl heptanoate 9.98 min, methyl 7-oxoheptanoate 13.75 min, dimethyl pimeloate 15.50 min.

**Synthesis and Characterisation of Methyl Esters of 2, *R* 2, *S* 2, 4, *SS* 6b and *RR* 6b.**

**1-(tetrahydropyran-2’-yloxy)tetradec-5-yn-7-ol (7).** A solution of 1-(tetrahydropyran-2’-yloxy)hex-5-yne2 (1.950 g, 10.6 mmol) in THF (80 mL) under a nitrogen atmosphere was cooled to –40C. To this was added a solution of n-butyl lithium (1.20 M, 10.3 mL, 17.0 mmol) followed after 2 h by a solution of octanal in THF (0.29 M, 60.0 mL, 17.2 mmol). After 1 h the solution was quenched with saturated, aqueous NH4Cl (50 mL) and diluted with diethyl ether (60 mL). The aqueous layer was extracted with diethyl ether (4 x 60 mL), the combined organic layers washed with brine (100 mL), dried over MgSO4 and the solvent removed *in vacuo*. The crude product was purified using flash chromatography (silica gel, 15% ethyl acetate in hexanes) to afford **7** (2.653 g, 8.45 mmol, 80%) as a clear, colourless oil. 1H NMR (200 MHz, CDCl3)  0.84 (3H, t, *J*1 = 6.6 Hz), 1.24-1.86 (23H, m), 2.12 (2H, d of t, *J*1 = 2.0 Hz, *J*2 = 6.6 Hz), 3.30-3.90 (4H, m), 4.30 (1H, t of t, *J*1 = 6.6 Hz, *J*2 = 2.0 Hz), 4.50 (1H, t, *J*1 = 3.0 Hz). 13C NMR (50 MHz, CDCl3)  14.1, 18.5, 19.5, 22.6, 25.2, 25.4 (2C), 28.8, 29.2 (2C), 30.6, 31.7, 38.1, 62.2, 62.6, 66.9, 81.7, 85.0, 98.7. GC/MS: calcd for C19H34O3, 310; (M-heptyl)+ found at *m/z* = 211. HRMS: calcd for C19H34O3Na, 333.2406; found, 333.2403. Anal. Calcd. For C19H34O3: C, 73.50; H, 11.04. Found C, 73.37; H, 11.44.

**Tetradec-5-yn-1,7-diol (8).** To a solution of **7** (2.438 g, 7.77 mmol) in methanol (100 mL) was added p-toluenesulfonic acid (0.200 g, 1.16 mmol) and the solution stirred for 2 h. Solid NaHCO3 was added to quench the reaction and the solvent removed *in vacuo*. Diethyl ether (60 mL) and water (60 mL) were added to the residue and the aqueous layer extracted with diethyl ether (5 x 40 mL), the combined organic layers washed with brine (100 mL), dried over MgSO4 and the solvent removed *in vacuo* to afford **8** (1.777 g, 7.77 mmol, 100%) as a clear, colourless oil. 1H NMR (200 MHz, CDCl3)  0.84 (3H, t, *J*1 = 6.5 Hz), 1.15-1.72 (16H, m), 2.19 (2H, d of t, *J*1 = 1.7 Hz, *J*2 = 6.6 Hz), 2.72 (2H, br s), 3.60 (2H, t, *J*1 = 6.1 Hz), 4.27 (1H, t of t, *J*1 = 6.3 Hz, *J*2 = 1.8 Hz). 13C NMR (50 MHz, CDCl3)  14.0, 18.4, 22.5, 24.8, 25.2, 29.1, 29.2, 31.5, 31.7, 38.0, 62.0, 62.4, 81.9, 84.7. GC/MS: calcd for C14H26O2, 226; (M-H2O, ethylene)+ found at *m/z* = 180. HRMS: calcd for C14H26O2Na, 249.1831; found, 249.1826.

**Methyl 7-oxotetradec-5-ynoate (9).** To a solution of **8** (0.379 g, 1.68 mmol) in acetone (15 mL) was added Jones Reagent (8 N) until the orange colour persisted. The solution was stirred for 30 min, after which water (50 mL) was added quench the reaction. The solution was extracted with hexane (4 x 30 mL), the combined organic layers dried over MgSO4 and the solvent removed *in vacuo*. The crude product was dissolved in diethyl ether (20 mL) and CH2N2 solution (0.3 M in diethyl ether) was then added to the solution at 0C until a slight yellow colour persisted. The solution was blown down with nitrogen to remove the remaining CH2N2 and the solution concentrated *in vacuo* to yield **9** (0.370 g, 1.47 mmol, 88%) as a clear, colourless oil. 1H NMR (200 MHz, CDCl3)  0.81 (3H, t*,* *J*1 = 6.3 Hz), 1.15-1.30 (8H, m), 1.58 (2H, quint, *J*1 = 6.8 Hz), 1.84 (2H, quint, *J*1 = 7.1 Hz), 2.40 (4H, 2 t, *J*1 = 7.1 Hz), 2.46 (2H, t, *J*1 = 7.4 Hz), 3.62 (3H, s). 13C NMR (50 MHz, CDCl3)  13.9, 18.2, 22.5, 22.8, 24.0, 28.8, 28.9, 31.5, 32.4, 45.4, 51.6, 92.2, 173.0, 188.2. GC/MS: calcd for C15H24O3, 252; (M)+ found at *m/z* = 252. HRMS: calcd for C15H24O3Na, 275.1623; found, 275.1628. Anal. Calcd. For C15H24O3: C, 71.39; H, 9.59. Found C, 71.25; H, 9.77.

**Methyl 7-hydroxytetradec-5-ynoate (10).** To a solution of **9** (0.080 g, 0.317 mmol) in methanol (25 mL) stirring at 0C was added NaBH4 (0.050 g, 1.27 mmol). The solution was stirred under a nitrogen atmosphere at 0C for 2 h after which the reaction was quenched by addition of CH2Cl2 (30 mL). The solution was washed with aqueous 5% oxalic acid solution (30 mL), which was extracted with CH2Cl2 (2 x 30 mL). The combined organic layers were washed with saturated, aqueous NaHCO3 (30 mL), brine (30 mL), dried over MgSO4 and the solvent removed *in vacuo*. The crude product was purified using flash chromatography (silica gel, 20% ethyl acetate in hexanes) to afford **10** (0.065 g, 0.256 mmol, 81%) as a clear, colourless oil. 1H NMR (200 MHz, CDCl3)  0.86 (3H, t*,* *J*1 = 6.8 Hz), 1.20-1.40 (9H, m), 1.55-1.70 (4H, m), 1.81 (2H, quint, *J*1 = 6.8 Hz), 2.27 (2H, d of t, *J*1 = 2.0 Hz, *J*2 = 6.8 Hz), 2.42 (2H, t, *J*1 = 7.4 Hz), 3.66 (3H, s), 4.31 (1H, m). 13C NMR (50 MHz, CDCl3)  14.1, 18.1, 22.6, 23.7, 25.2, 29.2 (2C), 31.7, 32.8, 38.1, 51.6, 62.6, 82.3, 83.9, 173.7. GC/MS: calcd for C15H26O3, 254; (M-OH)+ found at *m/z* = 237. HRMS: calcd for C15H26O3Na, 277.1780; found, 277.1772. Anal. Calcd. For C15H26O3: C, 70.83; H, 10.30. Found C, 70.87; H, 10.04.

**Methyl 7-*S*-hydroxytetradec-5-ynoate (10a).** Utilising a modified procedure of that reported by Parker and Ledeboer3 to incorporate the ester functionality. To a solution of **9** (0.084 g, 0.333 mmol) in THF (5 mL) stirring under a nitrogen atmosphere was added *S*-CBS borane (1 M solution in toluene, 0.68 mL, 0.680 mmol). After 10 min the solution was cooled to -30C and borane-dimethyl sulfide complex (5 M in diethyl ether, 0.074 mL, 0.370 mmol) added dropwise. After 2 h the solution was quenched with methanol (1 mL), warmed to room temperature and diluted with diethyl ether (20 mL). The organic layer was washed with a 1:1 solution of aqueous 1 M NaOH and saturated NaHCO3 (4 x 20 mL), brine (30 mL), dried over MgSO4 and the solvent removed *in vacuo*. The crude product was purified using flash chromatography (silica gel, 20% ethyl acetate in hexanes) to afford **10a** (0.078 g, 0.307 mmol, 92%, 74.4% ee (Chiracel OD, 3% isopropanol in hexanes, 0.8 mL/min flow rate, UV detector 215 nm: retention time for *R*-alcohol 15.2 min; *S*-alcohol 16.6 min)) as a clear, colourless oil that was spectroscopically identical to **10**. GC/MS: calcd for C15H26O3, 254; (M-OH)+ found at *m/z* = 237. HRMS: calcd for C15H26O3Na, 277.1780; found, 277.1784. Anal. Calcd. For C15H26O3: C, 70.83; H, 10.30. Found C, 70.76; H, 9.94.

**Methyl 7-*R*-hydroxytetradec-5-ynoate (10b).** Prepared in an analogous method to that used for **10a** utilising *R*-CBS borane. Isolation of **10b** (0.072 g, 0.283 mmol, 85%, 68.1% ee (Chiracel OD, 3% isopropanol in hexanes, 0.8 mL/min flow rate, UV detector 215 nm: retention time for *R*-alcohol 15.2 min; *S*-alcohol 16.6 min)) was as a clear, colourless oil that was spectroscopically identical to **10**. GC/MS: calcd for C15H26O3, 254; (M-OH)+ found at *m/z* = 237. HRMS: calcd for C15H26O3Na, 277.1780; found, 277.1775. Anal. Calcd. For C15H26O3: C, 70.83; H, 10.30. Found C, 70.58; H, 10.57.

**Methyl 7-hydroxytetradecanoate (2 methyl ester).** To a solution of **10** (0.065 g, 0.256 mmol) in methanol (5 mL) was added 10% Pd/C catalyst (0.005 g). The solution was introduced to a 1 atm hydrogen atmosphere and left to stir for 12 h. The solution was filtered to remove the catalyst before being concentrated *in vacuo*. The crude product was purified by flash chromatography (silica gel, 10% ethyl acetate in hexanes) to afford the methyl ester of **2** (0.038 g, 0.147 mmol, 58%) as a white solid (MP: 29.5-30.5C). NMR (200 MHz, CDCl3)  0.85 (3H, t, *J*1 = 6.6 Hz), 1.20-1.50 (19H, m), 1.61 (2H, quint, *J*1 = 7.0 Hz), 2.29 (2H, t, *J*1 = 7.4 Hz), 3.54 (1H, m), 3.64 (3H, s). 13C NMR (50 MHz, CDCl3)  14.1, 22.6, 24.8, 25.3, 25.6, 29.1, 29.3, 29.6, 31.8, 34.0, 37.2, 37.5, 51.5, 71.9, 174.3. GC/MS: calcd for C15H30O3, 258; *m/z* (%) 241 (0.5), 209 (3.0), 159 (27.4), 130 (40.3), 127 (100), 101 (25.2), 81 (48.3), 69 (30.8). HRMS: calcd for C15H30O3Na, 281.2093; found, 281.2090. Anal. Calcd. C15H30O3: C, 69.72; H, 11.70. Found C, 69.67; H, 12.08.

**Methyl 7-*S*-hydroxytetradecanoate (*S* 2 methyl ester).** Prepared in an analogous method to that used for **2** utilising 5% Pd/BaSO4 catalyst. Isolation of the methyl ester of ***S* 2** (0.011 g, 0.0426 mmol, 87%) was as a white solid (MP: 29.5-30.5C) that was spectroscopically identical to **2**. GC/MS: calcd for C15H30O3, 258; *m/z* (%) 241 (0.5), 209 (3.0), 159 (27.4), 130 (40.3), 127 (100), 101 (25.2), 81 (48.3), 69 (30.8). HRMS: calcd for C15H30O3Na, 281.2093; found, 281.2090. Anal. Calcd. For C15H30O3: C, 69.72; H, 11.70. Found C, 70.09; H, 12.14.

**Methyl 7-*R*-hydroxytetradecanoate (*R* 2 methyl ester).** Prepared in an analogous method to that used for ***S* 2**. Isolation of the methyl ester of ***R* 2** (0.010g, 0.0388 mmol, 90%) was as a white solid (MP: 29.5-30.5C) that was spectroscopically identical to **2**. GC/MS: calcd for C15H30O3, 258; *m/z* (%) 241 (0.5), 209 (3.0), 159 (27.4), 130 (40.3), 127 (100), 101 (25.2), 81 (48.3), 69 (30.8). HRMS: calcd for C15H30O3Na, 281.2093; found, 281.2088. Anal. Calcd. C15H30O3: C, 69.72; H, 11.70. Found C, 69.49; H, 11.99.

**Methyl 7-oxotetradecanoate (4 methyl ester).** Prepared in an analogous method to that used for ***S*-2**. Isolation of the methyl ester of **4** (0.026 g, 0.102 mmol, 100%) was as a clear, colourless oil. 1H NMR (200 MHz, CDCl3)  0.84 (3H, t*,* *J*1 = 6.6 Hz), 1.20-1.35 (10H, m), 1.45-1.70 (6H, m), 2.28 (2H, t, *J*1 = 7.6 Hz), 2.35 (2H, t, *J*1 = 7.3 Hz), 2.37 (2H, t, *J*1 = 7.1 Hz), 3.63 (3H, s). 13C NMR (50 MHz, CDCl3)  14.1, 22.6, 23.2, 23.8, 24.7, 28.6, 29.0, 29.2, 31.6, 33.8, 42.4, 42.8, 51.5, 174.1, 211.4. GC/MS: calcd for C15H28O3, 256; *m/z* (%) 256 (1.1), 172 (29.7), 154 (20.8), 142 (22.2), 140 (39.3), 125 (41.5), 115 (41.1), 57 (100). HRMS: calcd for C15H28O3Na, 279.1936; found, 279.1932. Anal. Calcd. For C15H28O3: C, 70.27; H, 11.01. Found C, 70.51; H, 11.37.

**5-*S*-hexyl-2,2-dimethyl-[1,3]-dioxolane-4-*R*-carbaldehyde (11a).** To a solution of oxalyl chloride (0.620 mL 10.1 mmol) in CH2Cl2 (25 mL) stirring at -78C under a nitrogen atmosphere was added sequentially dimethyl sulfoxide (0.182 mL, 3.60 mmol) followed after 10 min by (5-*S*-hexyl-2,2-dimethyl-[1,3]dioxolan-4-*S*-yl)-methanol4, 5 (0.345 g, 0.90 mmol). After 90 min the reaction was quenched by addition of triethyl amine (1.79 mL, 18.0 mmol) and allowed to warm to room temperature. Following addition of diethyl ether (40 mL) and brine (80 mL), the aqueous layer was extracted with diethyl ether (2 x 50 mL), the combined organic layers dried over Na2SO4 and the solvent removed *in vacuo* to afford **11a** (0.129 g, 0.60 mmol, 65%) as a clear, colourless oil that was used without further purification. GC/MS: calcd for C12H22O3, 214; (M-CH3)+ found at *m/z* = 199.

**5-*R*-hexyl-2,2-dimethyl-[1,3]-dioxolane-4-*S*-carbaldehyde (11b).** Prepared in an analogous method to that used for **11a** utilising (5-*R*-hexyl-2,2-dimethyl-[1,3]dioxolan-4-*R*-yl)-methanol4, 5. The crude product was used without further purification to yield **11b** (0.094 g, 0.44 mmol, 70%) as a clear, colourless oil. GC/MS: calcd for C12H22O3, 214; (M-CH3)+ found at *m/z* = 199.

**5-*S*-hexyl-2,2-dimethyl-[1,3]-dioxolane-4-*S*-6’-benzyloxyhex-1’-ene (12a).** To a solution of (5-benzyloxy)-1-pentyltriphenylphosphonium bromide (0.800 g, 1.86 mmol) in diethyl ether (10 mL) stirring under a nitrogen atmosphere was added a solution of n-butyl lithium (1.3 M in hexanes, 1.72 mL, 2.23 mmol). After 5 min the solution was cooled to -78C and a solution of **11a** was added (0.129 g in 5 mL diethyl ether, 0.60 mmol). After 2 h the reaction was warmed to room temperature and quenched by addition of ethanol (5 mL). Following addition of 25% diethyl ether in hexanes (50 mL) and brine (50 mL), the aqueous layer was extracted with 25% diethyl ether in hexanes (2 x 30 mL), the combined organic layers dried over MgSO4 and the solvent removed *in vacuo*. The crude product was purified by flash chromatography (silica gel, 3% ethyl acetate in hexanes) to afford **12a** (0.180 g, 0.48 mmol, 80%) as a clear, colourless oil. NMR (200 MHz, CDCl3)  0.86 (3H, t, *J*1 = 6.5 Hz), 1.20-1.70 (19H, m), 2.00-2.25 (2H, m), 3.46 (2H, t, *J*1 = 6.4 Hz), 3.61 (1H,m), 4.32 (2H, t, *J*1 = 8.7 Hz), 4.48 (2H, s), 5.25-5.40 (1H, m), 5.55-5.75 (1H, m), 7.34 (5H, m). 13C NMR (50 MHz, CDCl3)  14.0, 22.5, 25.9, 26.2 (2C), 27.3, 27.6, 29.3 (2C), 29.4, 31.7 (2C), 70.0, 72.8, 76.6, 80.8, 108.2, 126.7, 127.5 (2C), 128.3 (2C), 135.7, 138.5. GC/MS: calcd C24H38O3, 374; (M)+ found at *m/z* = 374.

**5-*R*-hexyl-2,2-dimethyl-[1,3]-dioxolane-4-*R*-6’-benzyloxyhex-1’-ene (12b).** Prepared in an analogous method to that used for **12a**. The crude product was used without further purification to yield **12b** (0.125 g, 0.33 mmol, 75%) as a clear, colourless oil that was spectroscopically identical to **19a**. GC/MS:calcd C24H38O3, 374; (M)+ found at *m/z* = 374.

**5-*S*-hexyl-2,2-dimethyl-[1,3]-dioxolane-4-*S*-hexan-1’-ol (13a).** Prepared in an analogous method to that used for **2**. The solution was filtered to remove the catalyst before being concentrated *in vacuo* to yield **13a** (0.131 g, 0.46 mmol, 95%) as a clear, colourless oil. NMR (200 MHz, CDCl3)  0.86 (3H, t, *J*1 = 6.6 Hz), 1.20-1.60 (21H, m), 1.35 (6H, s), 3.56 (2H, m), 3.62 (2H, t, *J*1 = 6.5 Hz). 13C NMR (50 MHz, CDCl3)  14.1, 22.6, 25.6, 26.1 (2C), 27.3 (2C), 29.4, 29.5, 31.7, 32.7, 32.9, 33.0, 63.0, 81.0 (2C), 107.7. GC/MS: calcd for C17H34O3, 286; (M-CH3)+ found at *m/z* = 271. Anal. Calcd. For C17H34O3: C, 71.28; H, 11.96. Found C, 71.22; H, 11.73.

**5-*R*-hexyl-2,2-dimethyl-[1,3]-dioxolane-4-*R*-hexan-1’-ol (13b).** Prepared in an analogous method to that used for **2**. The solution was filtered to remove the catalyst before being concentrated *in vacuo* to yield **13b** (0.040 g, 0.14 mmol, 75%) as a clear, colourless oil that was spectroscopically identical to **13a**. GC/MS: calcd for C17H34O3, 286; (M-CH3)+ found at *m/z* = 271. Anal. Calcd. For C17H34O3: C, 71.28; H, 11.96. Found C, 71.34; H, 11.62.

**Methyl 5-*S*-hexyl-2,2-dimethyl-[1,3]-dioxolane-4-*S*-hexanoate (14a).** To a solution of **13a** (0.131 g, 0.46 mmol) in 1:1:2 acetonitrile/ethyl acetate/water (20 mL) was added sequentially sodium periodate (0.285 g, 0.78 mmol) and ruthenium(III)trichloride dihydrate (0.005 g). After 45 min the reaction was filtered prior to addition of ethyl acetate (20 mL) and brine (20 mL). The aqueous layer was extracted with ethyl acetate (4 x 30 mL), the combined organic layers dried over MgSO4 and the solvent removed *in vacuo*. The crude product was dissolved in diethyl ether (10 mL) and CH2N2 solution (0.3 M in diethyl ether) was added to the solution at 0C until a slight yellow colour persisted. The solution was blown down with nitrogen to remove the remaining CH2N2 and the solution concentrated *in vacuo* to yield **14a** (0.140 g, 0.45 mmol, 98%) as a clear, colourless oil. NMR (200 MHz, CDCl3)  0.86 (3H, t, *J*1 = 6.4 Hz), 1.20-1.70 (18H, m), 1.35 (6H, s), 2.30 (2H, t, *J*1 = 7.4 Hz), 3.56 (2H, m), 3.65 (3H, s). 13C NMR (50 MHz, CDCl3)  14.1, 22.6, 24.8, 25.8, 26.1, 27.3, 29.2, 29.4, 30.9, 31.7, 32.8, 33.0, 34.0, 51.5, 80.9, 81.0, 107.7, 174.2. GC/MS: calcd for C18H34O4, 314; (M-CH3)+ found at *m/z* = 299. Anal. Calcd. For C18H34O4: C, 68.75; H, 10.90. Found C, 68.90; H, 10.71.

**Methyl 5-*R*-hexyl-2,2-dimethyl-[1,3]-dioxolane-4-*R*-hexanoate (14b).** Prepared in an analogous method to that used for **14a** to afford **14b** (0.040 g, 0.13 mmol, 96%) as a clear, colourless oil that was spectroscopically identical to **14a**. GC/MS: calcd for C18H34O4, 314; (M-CH3)+ found at *m/z* = 299. Anal. Calcd. For C18H34O4: C, 68.75; H, 10.90. Found C, 69.11; H, 10.63.

**Methyl 7,8-*S*,*S*-dihydroxytetradecanoate (*S,S* 6b methyl ester).** Prepared in an analogous method to that used for **8** to afford the methyl ester of ***S,S* 6b** (0.038 g, 0.14 mmol, 95%) as a white solid (MP: 35-36C). NMR (200 MHz, CDCl3)  0.86 (3H, t, *J*1 = 6.5 Hz), 1.20-1.70 (18H, m), 1.96 (2H, br s), 2.30 (2H, t, *J*1 = 7.3 Hz), 3.37 (2H, m), 3.65 (3H, s). 13C NMR (50 MHz, CDCl3)  14.1, 22.6, 24.8, 25.3, 25.6, 29.1, 29.3, 31.8, 33.3, 33.6, 34.0, 51.5, 74.4, 74.5, 174.2. GC/MS: calcd for C15H30O4, 274; *m/z* (%) 257 (0.7), 225 (2.3), 208 (8.5), 159 (53.1), 127 (49.5), 81 (27.0), 74 (18.3), 43 (100). Anal. Calcd. For C15H30O4: C, 65.66; H, 11.02. Found C, 65.36; H, 11.16.

**Methyl 7,8-*R*,*R*-dihydroxytetradecanoate (*R*,*R* 6b methyl ester).** Prepared in an analogous method to that used for **8** to afford the methyl ester of ***R,R* 6b** (0.019 g, 0.07 mmol, 95%) as a white solid (MP: 35-36C) that was spectroscopically identical to the methyl ester of ***S,S* 6b**. GC/MS: calcd for C15H30O4, 274; *m/z* (%) 257 (0.7), 225 (2.3), 208 (8.5), 159 (53.1), 127 (49.5), 81 (27.0), 74 (18.3), 43 (100). Anal. Calcd. For C15H30O4: C, 65.66; H, 11.02. Found C, 65.49; H, 11.17.

**References**

1 J. E. Stok and J. J. De Voss, *Arch. Biochem. Biophys.*, 2000, **384**, 351.

2 T. Ando, M. H. Vu, S. Yoshida, and N. Takahashi, *Agr. Biol. Chem.*, 1982, **46**, 717.

3 K. A. Parker and M. W. Ledeboer, *J. Org. Chem.*, 1996, **61**, 3214.

4 X.-X. Xu and Y.-H. Zhu, *Tetrahedron Lett.*, 1995, **36**, 9173.

5 E. Hungerbuehler and D. Seebach, *Helv. Chim. Acta*, 1981, **64**, 687.
